# Supplementary material for: Influenza A virus coinfection dynamics are shaped by distinct virus-virus interactions within and between cells
Source: PLoS Pathog. 2023 Mar 2;19(3):e1010978. doi: 10.1371/journal.ppat.1010978 (PMC10013887; doi:10.1371/journal.ppat.1010978)
Supplement: S1 Data — (XLSX) [file ppat.1010978.s007.xlsx]

## Sheet: Fig 1
	Virus	Var MOI (GC/cell)	Replicate	Experiment	var vRNA copy no. per cell	wt vRNA copy no. per cell	Relative GFHK99wt vRNA copy no.
Fig 1A	GFHK99	0	1	1	0	0.00366667
	GFHK99	0	2	1	0.000666667	0.00125
	GFHK99	0	3	1	0	0.00229167
	GFHK99	0.03	1	1	0.0366667	0.000916667	0.38	WT MOI = 0.005 GC/Cell
	GFHK99	0.03	2	1	0.01375	0.00470833	1.96
	GFHK99	0.03	3	1	0.0429167	0.00366667	1.53
	GFHK99	0.1	1	1	0.0858333	0.00466667	1.94
	GFHK99	0.1	2	1	0.0875	0.003125	1.3
	GFHK99	0.1	3	1	0.140417	0.00633333	2.64
	GFHK99	0.3	1	1	1.08	0.008875	3.69
	GFHK99	0.3	2	1	0.91625	0.00895833	3.73
	GFHK99	0.3	3	1	1.18	0.0183333	7.63
	GFHK99	1	1	1	13.9167	0.0458333	19.08
	GFHK99	1	2	1	5.89167	0.0266667	11.1
	GFHK99	1	3	1	13.3875	0.0795833	33.12
	GFHK99	3	1	1	76.6042	0.0641667	26.71
	GFHK99	3	2	1	92.5208	0.0858333	35.72
	GFHK99	3	3	1	132.292	0.164167	68.32
	GFHK99	10	1	1	590.833	0.22875	95.2
	GFHK99	10	2	1	424.167	0.187083	77.86
	GFHK99	10	3	1	836.667	0.33125	137.86
Fig 1B	MaMN99	0.01	1	1			1.264	WT MOI = 0.005 GC/Cell
	MaMN99	0.01	2	1			1.366
	MaMN99	0.01	3	1			1.666
	MaMN99	0.05	1	1			3.455
	MaMN99	0.05	2	1			2.495
	MaMN99	0.05	3	1			2.298
	MaMN99	0.1	1	1			3.668
	MaMN99	0.1	2	1			2.913
	MaMN99	0.1	3	1			3.594
	MaMN99	0.5	1	1			3.414
	MaMN99	0.5	2	1			4.201
	MaMN99	0.5	3	1			3.217
	MaMN99	1	1	1			2.445
	MaMN99	1	2	1			2.068
	MaMN99	1	3	1			2.544
	MaMN99	5	1	1			0.542
	MaMN99	5	2	1			0.837
	MaMN99	5	3	1			0.739
Fig 1C	Pan99	0	1	1	0.0658333	0.7725		WT MOI = 0.005 GC/Cell
	Pan99	0	2	1	0	0.315
	Pan99	0	3	1	0.00358333	0.48
	Pan99	0.03	1	1	5.275	6.775	12.97
	Pan99	0.03	2	1	3.66667	4.30833	8.25
	Pan99	0.03	3	1	4.59167	5.64167	10.8
	Pan99	0.1	1	1	10.7833	13.425	25.69
	Pan99	0.1	2	1	7.625	8.59167	16.44
	Pan99	0.1	3	1	6.10833	6.44167	12.33
	Pan99	0.3	1	1	36.2333	36.5083	69.87
	Pan99	0.3	2	1	33.575	35.8583	68.63
	Pan99	0.3	3	1	18.9917	20.9333	40.06
	Pan99	1	1	1	87.8125	93.2292	178.43
	Pan99	1	2	1	45.9375	48.4167	92.66
	Pan99	1	3	1	37.4583	37.2917	71.37
	Pan99	3	1	1	370	382.083	731.26
	Pan99	3	2	1	245.208	236.042	451.754
	Pan99	3	3	1	467.917	448.542	858.453
	Pan99	10	1	1	585.833	604.792	1157.5
	Pan99	10	2	1	607.292	532.292	1018.74
	Pan99	10	3	1	531.25	527.708	1009.97
	Pan99	0	1	2	0.00441667	1.17167
	Pan99	0	2	2	0	0.45
	Pan99	0	3	2	0.0170833	1.2
	Pan99	0.03	1	2	2.3725	2.89167	3.07
	Pan99	0.03	2	2	2.69167	2.95833	3.15
	Pan99	0.03	3	2	4.25	5.80833	6.18
	Pan99	0.1	1	2	8.48333	10.3583	11.01
	Pan99	0.1	2	2	8.25	8.80833	9.37
	Pan99	0.1	3	2	13.4917	14.3167	15.22
	Pan99	0.3	1	2	52.8333	50.35	53.53
	Pan99	0.3	2	2	27.575	57.8333	61.49
	Pan99	0.3	3	2	25.7417	30.45	32.37
	Pan99	1	1	2	119	119.083	126.61
	Pan99	1	2	2	90.3958	100.167	106.5
	Pan99	1	3	2	140.417	145.062	154.23
	Pan99	3	1	2	471.667	433.333	460.721
	Pan99	3	2	2	313.542	264.167	280.862
	Pan99	3	3	2	553.333	187.833	199.705
	Pan99	10	1	2	1070.42	1037.5	1103.07
	Pan99	10	2	2	707.917	402.083	427.496
	Pan99	10	3	2	1296.67	1007.08	1070.73
Fig 1D	NL09	0.005	1	1			0.603	WT MOI = 0.005 GC/Cell
	NL09	0.005	2	1			0.631
	NL09	0.005	3	1			0.688
	NL09	0.01	1	1			0.488
	NL09	0.01	2	1			0.447
	NL09	0.01	3	1			0.517
	NL09	0.05	1	1			0.069
	NL09	0.05	2	1			0.088
	NL09	0.05	3	1			0.077
	NL09	0.1	1	1			0.039
	NL09	0.1	2	1			0.019
	NL09	0.1	3	1			0.021
	NL09	1	1	1			0.002
	NL09	1	2	1			0.002
	NL09	1	3	1			0.005

## Sheet: Fig 2
	Coinfecting Virus	Var MOI (GC/cell)	Replicate	Experiment	var vRNA copy no. per cell	wt vRNA copy no. per cell	Relative GFHK99wt vRNA copy no.
Fig 2A	MaMN99	0	1	1	0.000625	0.000333333		GFHK99wt MOI = 0.005 GC/Cell
	MaMN99	0	2	1	0	0.000666667
	MaMN99	0	3	1	0	0.000958333
	MaMN99	0.03	1	1	1.08417	0.00629167	9.64
	MaMN99	0.03	2	1	0.93625	0.00458333	7.02
	MaMN99	0.03	3	1	0.733333	0.00704167	10.79
	MaMN99	0.1	1	1	10.0417	0.0520833	79.79
	MaMN99	0.1	2	1	5.125	0.0225	34.47
	MaMN99	0.1	3	1	5.49167	0.0508333	77.87
	MaMN99	0.3	1	1	8.29583	0.0429167	65.74
	MaMN99	0.3	2	1	36.625	0.3925	601.28
	MaMN99	0.3	3	1	10.4792	0.0816667	125.11
	MaMN99	1	1	1	83	0.617083	945.32
	MaMN99	1	2	1	102.271	0.92625	1418.94
	MaMN99	1	3	1	28	0.170417	261.06
	MaMN99	3	1	1	82.3958	0.453333	694.47
	MaMN99	3	2	1	329.583	3.33333	5106.38
	MaMN99	3	3	1	195.208	1.89167	2897.87
	MaMN99	10	1	1	566.042	4.10833	6293.62
	MaMN99	10	2	1	1656.25	18.2458	27951.1
	MaMN99	10	3	1	321.25	3.7	5668.09
	GFHK99var	0	4	3	0	0.00366667
	GFHK99var	0	5	3	0.000666667	0.00125
	GFHK99var	0	6	3	0	0.00229167
	GFHK99var	0.03	1	3	0.0366667	0.000916667	0.38
	GFHK99var	0.03	2	3	0.01375	0.00470833	1.96
	GFHK99var	0.03	3	3	0.0429167	0.00366667	1.53
	GFHK99var	0.1	1	3	0.0858333	0.00466667	1.94
	GFHK99var	0.1	2	3	0.0875	0.003125	1.3
	GFHK99var	0.1	3	3	0.140417	0.00633333	2.64
	GFHK99var	0.3	1	3	1.08	0.008875	3.69
	GFHK99var	0.3	2	3	0.91625	0.00895833	3.73
	GFHK99var	0.3	3	3	1.18	0.0183333	7.63
	GFHK99var	1	1	3	13.9167	0.0458333	19.08
	GFHK99var	1	2	3	5.89167	0.0266667	11.1
	GFHK99var	1	3	3	13.3875	0.0795833	33.12
	GFHK99var	3	1	3	76.6042	0.0641667	26.71
	GFHK99var	3	2	3	92.5208	0.0858333	35.72
	GFHK99var	3	3	3	132.292	0.164167	68.32
	GFHK99var	10	1	3	590.833	0.22875	95.2
	GFHK99var	10	2	3	424.167	0.187083	77.86
	GFHK99var	10	3	3	836.667	0.33125	137.86
	MaMN99	0	1	2	0.00275	0.00325
	MaMN99	0	2	2	0	0.003
	MaMN99	0	3	2	0.00141667	0.00133333
	MaMN99	0.03	1	2	0.645	0.0075	2.97
	MaMN99	0.03	2	2	0.534167	0.00225	0.89
	MaMN99	0.03	3	2	0.7025	0.00383333	1.52
	MaMN99	0.1	1	2	2.99167	0.0196667	7.78
	MaMN99	0.1	2	2	3.15833	0.0189167	7.48
	MaMN99	0.1	3	2	2.975	0.0129167	5.11
	MaMN99	0.3	1	2	19.175	0.136667	54.07
	MaMN99	0.3	2	2	12.65	0.0533333	21.1
	MaMN99	0.3	3	2	16.1667	0.0858333	33.96
	MaMN99	1	1	2	45.4167	0.238333	94.29
	MaMN99	1	2	2	63.5625	0.43	170.11
	MaMN99	1	3	2	44.125	0.1675	66.26
	MaMN99	3	1	2	163.542	0.9325	368.9
	MaMN99	3	2	2	354.167	2.18917	866.04
	MaMN99	3	3	2	126.812	1.09417	432.86
	MaMN99	10	1	2	53.2292	2.0825	823.85
	MaMN99	10	2	2	442.292	2.78083	1100.11
	MaMN99	10	3	2	1123.96	9.875	3906.59
	GFHK99var	0	4	2	0.004	0.0110833
	GFHK99var	0	5	2	0.00191667	0.00541667
	GFHK99var	0	6	2	0.0045	0.0065
	GFHK99var	0.03	1	2	0.0308333	0.0103333	1.35
	GFHK99var	0.03	2	2	0.0224167	0.00408333	0.53
	GFHK99var	0.03	3	2	0.0286667	0.00858333	1.12
	GFHK99var	0.1	1	2	0.106667	0.0325	4.24
	GFHK99var	0.1	2	2	0.115833	0.0065	0.85
	GFHK99var	0.1	3	2	0.0591667	0.00266667	0.35
	GFHK99var	0.3	1	2	0.499167	0.00733333	0.96
	GFHK99var	0.3	2	2	0.396667	0.00516667	0.67
	GFHK99var	0.3	3	2	0.339167	0.00666667	0.87
	GFHK99var	1	1	2	2.96667	0.0140833	1.84
	GFHK99var	1	2	2	2.4925	0.0100833	1.32
	GFHK99var	1	3	2	2.2825	0.0173333	2.26
	GFHK99var	3	1	2	37.4583	0.055	7.17
	GFHK99var	3	2	2	33.3333	0.0558333	7.28
	GFHK99var	3	3	2	27.1667	0.05	6.52
	GFHK99var	10	1	2	291.667	0.123333	16.09
	GFHK99var	10	2	2	207.5	0.123333	16.09
	GFHK99var	10	3	2	261.25	0.1	13.04
Fig 2B	Pan99	0	1	1	0.00291667	0.0254167		GFHK99wt MOI = 0.005 GC/Cell
	Pan99	0	2	1	0.000583333	0.0225
	Pan99	0	3	1	0.004	0.01625
	Pan99	0.03	1	1	1.48333	0.0191667	0.9
	Pan99	0.03	2	1	1.98333	0.0304167	1.42
	Pan99	0.03	3	1	3.11667	0.03625	1.69
	Pan99	0.1	1	1	1.30542	0.0108333	0.51
	Pan99	0.1	2	1	4.41667	0.0445833	2.08
	Pan99	0.1	3	1	3.02083	0.04	1.87
	Pan99	0.3	1	1	15.2583	0.0866667	4.05
	Pan99	0.3	2	1	10.3292	0.0841667	3.94
	Pan99	0.3	3	1	11.475	0.0820833	3.84
	Pan99	1	1	1	30.9167	0.189167	8.84
	Pan99	1	2	1	28.6667	0.160833	7.52
	Pan99	1	3	1	29.7083	0.163333	7.64
	Pan99	3	1	1	24.5208	0.108333	5.06
	Pan99	3	2	1	98.9583	0.3675	17.18
	Pan99	3	3	1	71.0208	0.3175	14.84
	Pan99	10	1	1	95.7708	0.295417	13.81
	Pan99	10	2	1	184.583	0.495833	23.18
	Pan99	10	3	1	237.083	0.787083	36.8
	GFHK99var	0	4	1	0.000625	0.0608333	0.0106888
	GFHK99var	0	5	1	0.000333333	0.0441667	0.00570071
	GFHK99var	0	6	1	0.000333333	0.0704167	0.00570071
	GFHK99var	0.03	1	1	0.04	0.0491667	0.84
	GFHK99var	0.03	2	1	0.0145833	0.02	0.34
	GFHK99var	0.03	3	1	0.0366667	0.0770833	1.32
	GFHK99var	0.1	1	1	0.15375	0.0858333	1.47
	GFHK99var	0.1	2	1	0.0608333	0.0291667	0.5
	GFHK99var	0.1	3	1	0.112083	0.0604167	1.03
	GFHK99var	0.3	1	1	1.17292	0.261667	4.48
	GFHK99var	0.3	2	1	0.37375	0.07375	1.26
	GFHK99var	0.3	3	1	1.29583	0.210417	3.6
	GFHK99var	1	1	1	10.7667	0.55375	9.47
	GFHK99var	1	2	1	6.7625	0.3625	6.2
	GFHK99var	1	3	1	10.6375	0.639583	10.94
	GFHK99var	3	1	1	132.708	2.63333	45.04
	GFHK99var	3	2	1	54.7083	0.820417	14.03
	GFHK99var	3	3	1	119.604	2.3625	40.4
	GFHK99var	10	1	1	1270.42	5.17083	88.43
	GFHK99var	10	2	1	500.833	2.04167	34.92
	GFHK99var	10	3	1	1075	5.43333
	Pan99	0	1	2	0.000958333	0.000958333
	Pan99	0	2	2	0.00325	0.00183333
	Pan99	0	3	2	0.00416667	0.002375	2.41935
	Pan99	0.03	1	2	0.489583	0.00504167	2.93
	Pan99	0.03	2	2	0.31625	0.00120833	0.7
	Pan99	0.03	3	2	0.510417	0.002125	1.23
	Pan99	0.1	1	2	2.25	0.00191667	1.11
	Pan99	0.1	2	2	1.37083	0.00183333	1.06
	Pan99	0.1	3	2	1.24458	0.00304167	1.77
	Pan99	0.3	1	2	11.4042	0.0055	3.19
	Pan99	0.3	2	2	3.75833	0.003375	1.96
	Pan99	0.3	3	2	5.775	0.00629167	3.65
	Pan99	1	1	2	18.1417	0.00795833	4.62
	Pan99	1	2	2	19.0375	0.011	6.39
	Pan99	1	3	2	12.6917	0.00504167	2.93
	Pan99	3	1	2	28.5625	0.012875	7.48
	Pan99	3	2	2	45.7708	0.0416667	24.19
	Pan99	3	3	2	35.5625	0.0170833	9.92
	Pan99	10	1	2	34.8125	0.007375	4.28
	Pan99	10	2	2	123.812	0.0429167	24.92
	Pan99	10	3	2	116.833	0.06375	37.02
	GFHK99var	0	4	3	0	0.00366667
	GFHK99var	0	5	3	0.000666667	0.00125
	GFHK99var	0	6	3	0	0.00229167
	GFHK99var	0.03	1	3	0.0366667	0.000916667	0.38
	GFHK99var	0.03	2	3	0.01375	0.00470833	1.96
	GFHK99var	0.03	3	3	0.0429167	0.00366667	1.53
	GFHK99var	0.1	1	3	0.0858333	0.00466667	1.94
	GFHK99var	0.1	2	3	0.0875	0.003125	1.3
	GFHK99var	0.1	3	3	0.140417	0.00633333	2.64
	GFHK99var	0.3	1	3	1.08	0.008875	3.69
	GFHK99var	0.3	2	3	0.91625	0.00895833	3.73
	GFHK99var	0.3	3	3	1.18	0.0183333	7.63
	GFHK99var	1	1	3	13.9167	0.0458333	19.08
	GFHK99var	1	2	3	5.89167	0.0266667	11.1
	GFHK99var	1	3	3	13.3875	0.0795833	33.12
	GFHK99var	3	1	3	76.6042	0.0641667	26.71
	GFHK99var	3	2	3	92.5208	0.0858333	35.72
	GFHK99var	3	3	3	132.292	0.164167	68.32
	GFHK99var	10	1	3	590.833	0.22875	95.2
	GFHK99var	10	2	3	424.167	0.187083	77.86
	GFHK99var	10	3	3	836.667	0.33125	137.86
Fig 2C	NL09	0	1	1	0.003125	0		GFHK99wt MOI = 0.005 GC/Cell
	NL09	0	2	1	0.00220833	0.00383333
	NL09	0	3	1	0.000708333	0.00491667
	NL09	0.03	1	1	1.05	0.00883333	3.02857
	NL09	0.03	2	1	0.979167	0.01125	3.85714
	NL09	0.03	3	1	1.23333	0.014125	4.84286
	NL09	0.1	1	1	3.1875	0.035	12
	NL09	0.1	2	1	3.16667	0.0329167	11.2857
	NL09	0.1	3	1	4.75	0.035	12
	NL09	0.3	1	1	10.9167	0.11625	39.8571
	NL09	0.3	2	1	11.1667	0.095	32.5714
	NL09	0.3	3	1	12.2917	0.1175	40.2857
	NL09	1	1	1	24.5417	0.23375	80.1429
	NL09	1	2	1	23.4167	0.232083	79.5714
	NL09	1	3	1	29.2292	0.159583	54.7143
	NL09	3	1	1	87.5	0.488333	167.429
	NL09	3	2	1	66.0417	0.489583	167.857
	NL09	3	3	1	74.1667	0.376667	129.143
	NL09	10	1	1	131.25	0.57375	196.714
	NL09	10	2	1	108.958	0.511667	175.429
	NL09	10	3	1	0	0.000333333	0.114286
	GFHK99var	0	4	1	0.00133333	0.0125
	GFHK99var	0	5	1	0.001	0.005625
	GFHK99var	0	6	1	0.000333333	0.00625
	GFHK99var	0.03	1	1	0.00470833	0.009	1.10769
	GFHK99var	0.03	2	1	0.00466667	0.0055	0.676923
	GFHK99var	0.03	3	1	0.00216667	0.01	1.23077
	GFHK99var	0.1	1	1	0.0125	0.00620833	0.764103
	GFHK99var	0.1	2	1	0.008	0.00691667	0.851282
	GFHK99var	0.1	3	1	0.0129167	0.009125	1.12308
	GFHK99var	0.3	1	1	0.1175	0.0245833	3.02564
	GFHK99var	0.3	2	1	0.110833	0.014625	1.8
	GFHK99var	0.3	3	1	0.128333	0.0220833	2.71795
	GFHK99var	1	1	1	1.07917	0.0541667	6.66667
	GFHK99var	1	2	1	0.96875	0.0441667	5.4359
	GFHK99var	1	3	1	1.2125	0.0491667	6.05128
	GFHK99var	3	1	1	11	0.144583	17.7949
	GFHK99var	3	2	1	9.8125	0.146667	18.0513
	GFHK99var	3	3	1	10.4792	0.136667	16.8205
	GFHK99var	10	1	1	107.083	0.5075	62.4615
	GFHK99var	10	2	1	86.6667	0.439583	54.1026
	GFHK99var	10	3	1	190.208	0.885417	108.974
	NL09	0	1	2	0.00366667	0.0258333
	NL09	0	2	2	0.00241667	0.0204167
	NL09	0	3	2	0.00170833	0.0216667
	NL09	0.03	1	2	2.22917	0.0466667	2.06135
	NL09	0.03	2	2	2.075	0.0379167	1.67485
	NL09	0.03	3	2	3.05417	0.05	2.20859
	NL09	0.1	1	2	9.49167	0.09875	4.36196
	NL09	0.1	2	2	5.57083	0.0695833	3.07362
	NL09	0.1	3	2	7.51667	0.095	4.19632
	NL09	0.3	1	2	16.7458	0.208333	9.20245
	NL09	0.3	2	2	19.0167	0.243333	10.7485
	NL09	0.3	3	2	24.3042	0.2625	11.5951
	NL09	1	1	2	41.875	0.8175	36.1104
	NL09	1	2	2	43.5167	0.926667	40.9325
	NL09	1	3	2	33.425	0.658333	29.0798
	NL09	3	1	2	97.9167	0.94125	41.5767
	NL09	3	2	2	86.6875	0.665	29.3742
	NL09	3	3	2	114.375	0.850417	37.5644
	NL09	10	1	2	302.083	2.00833	88.7117
	NL09	10	2	2	204.583	1.31667	58.1595
	NL09	10	3	2	189.375	1.26667	55.9509
	GFHK99var	0	4	2	0.0166667	0.0133333
	GFHK99var	0	5	2	0.015	0.009875
	GFHK99var	0	6	2	0.00966667	0.0133333
	GFHK99var	0.03	1	2	0.045	0.0158333	1.29989
	GFHK99var	0.03	2	2	0.05125	0.0125	1.02623
	GFHK99var	0.03	3	2	0.03	0.0131667	1.08096
	GFHK99var	0.1	1	2	0.02375	0.0179167	1.47092
	GFHK99var	0.1	2	2	0.0791667	0.0120833	0.992018
	GFHK99var	0.1	3	2	0.0770833	0.015	1.23147
	GFHK99var	0.3	1	2	0.19375	0.01625	1.33409
	GFHK99var	0.3	2	2	0.184167	0.0208333	1.71038
	GFHK99var	0.3	3	2	0.16375	0.03125	2.56556
	GFHK99var	1	1	2	1.0975	0.0570833	4.68643
	GFHK99var	1	2	2	0.862917	0.0429167	3.52338
	GFHK99var	1	3	2	1.05042	0.0458333	3.76283
	GFHK99var	3	1	2	16.4583	0.282917	23.2269
	GFHK99var	3	2	2	6.6875	0.12875	10.5701
	GFHK99var	3	3	2	10.625	0.185417	15.2223
	GFHK99var	10	1	2	233.542	1.35833	111.517
	GFHK99var	10	2	2	133.542	0.652917	53.6032
	GFHK99var	10	3	2	238.333	1.1625	95.439

## Sheet: Fig 3
Fig 3A	Virus	Var MOI (GC/cell)	Replicate	Experiment	var vRNA copy no. per cell	wt vRNA copy no. per cell	Relative GFHK99wt vRNA copy no.
	GFHK99 PA K26E	0	1	1	0.003375	0.146667		GFHK99wt PA K26E MOI = 0.005 GC/Cell
	GFHK99 PA K26E	0	2	1	0.0441667	0.0545833
	GFHK99 PA K26E	0	3	1	0.00558333	0.05625
	GFHK99 PA K26E	0.03	1	1	0.9	0.09375	1.09
	GFHK99 PA K26E	0.03	2	1	0.609583	0.0633333	0.74
	GFHK99 PA K26E	0.03	3	1	0.625417	0.0533333	0.62
	GFHK99 PA K26E	0.1	1	1	2.84167	0.09375	1.09
	GFHK99 PA K26E	0.1	2	1	1.68333	0.06	0.7
	GFHK99 PA K26E	0.1	3	1	1.37917	0.0458333	0.53
	GFHK99 PA K26E	0.3	1	1	8.5375	0.0995833	1.16
	GFHK99 PA K26E	0.3	2	1	5.94583	0.0820833	0.96
	GFHK99 PA K26E	0.3	3	1	9.48333	0.106667	1.24
	GFHK99 PA K26E	1	1	1	22.9958	0.09875	1.15
	GFHK99 PA K26E	1	2	1	18.8208	0.0720833	0.84
	GFHK99 PA K26E	1	3	1	26.6083	0.109167	1.27
	GFHK99 PA K26E	3	1	1	66.2083	0.0558333	0.65
	GFHK99 PA K26E	3	2	1	71.5	0.07625	0.89
	GFHK99 PA K26E	3	3	1	122.542	0.1325	1.54
	GFHK99 PA K26E	10	1	1	303.125	0.0716667	0.83
	GFHK99 PA K26E	10	2	1	247.708	0.0708333	0.83
	GFHK99 PA K26E	10	3	1	610.833	0.162917	1.9
	GFHK99 PA K26E	0	1	2	0	0.23125
	GFHK99 PA K26E	0	2	2	0.00154167	0.125417
	GFHK99 PA K26E	0	3	2	0.00195833	0.114167
	GFHK99 PA K26E	0.03	1	2	3.1375	0.3075	1.96
	GFHK99 PA K26E	0.03	2	2	1.2375	0.115	0.73
	GFHK99 PA K26E	0.03	3	2	1.15833	0.0879167	0.56
	GFHK99 PA K26E	0.1	1	2	6.24167	0.18625	1.19
	GFHK99 PA K26E	0.1	2	2	4.25833	0.133333	0.85
	GFHK99 PA K26E	0.1	3	2	6.54167	0.172083	1.1
	GFHK99 PA K26E	0.3	1	2	14.7792	0.138333	0.88
	GFHK99 PA K26E	0.3	2	2	14.9708	0.147083	0.94
	GFHK99 PA K26E	0.3	3	2	26.6417	0.246667	1.57
	GFHK99 PA K26E	1	1	2	68.3125	0.187083	1.19
	GFHK99 PA K26E	1	2	2	65.2708	0.124583	0.79
	GFHK99 PA K26E	1	3	2	72.7708	0.224583	1.43
	GFHK99 PA K26E	3	1	2	224.792	0.182083	1.16
	GFHK99 PA K26E	3	2	2	302.5	0.390833	2.49
	GFHK99 PA K26E	3	3	2	178.542	0.174583	1.11
	GFHK99 PA K26E	10	1	2	632.5	0.131667	0.84
	GFHK99 PA K26E	10	2	2	1475	0.29	1.85
	GFHK99 PA K26E	10	3	2	1228.75	0.426667	2.72
Fig 3B	Coinfecting Virus	Var MOI (GC/cell)	Replicate	Experiment	var vRNA copy no. per cell	wt vRNA copy no. per cell	Relative GFHK99wt vRNA copy no.
	GFHK99var PA K26E	0	1	1	0.00279167	0.00325		GFHK99wt MOI = 0.005 GC/Cell
	GFHK99var PA K26E	0	2	1	0.00383333	0.00329167
	GFHK99var PA K26E	0	3	1	0.00475	0.0035
	GFHK99var PA K26E	0.03	1	1	0.837917	0.00808333	2.41494
	GFHK99var PA K26E	0.03	2	1	1.01667	0.0216667	6.47303
	GFHK99var PA K26E	0.03	3	1	1.1075	0.01625	4.85477
	GFHK99var PA K26E	0.1	1	1	4.45833	0.05125	15.3112
	GFHK99var PA K26E	0.1	2	1	3.25417	0.0158333	4.73029
	GFHK99var PA K26E	0.1	3	1	3.67917	0.01625	4.85477
	GFHK99var PA K26E	0.3	1	1	8.625	0.0691667	20.6639
	GFHK99var PA K26E	0.3	2	1	16.0292	0.14625	43.6929
	GFHK99var PA K26E	0.3	3	1	22.375	0.19	56.7635
	GFHK99var PA K26E	1	1	1	41.6667	0.164167	49.0456
	GFHK99var PA K26E	1	2	1	86.1875	0.332917	99.4606
	GFHK99var PA K26E	1	3	1	66.7292	0.2725	81.4108
	GFHK99var PA K26E	3	1	1	122.438	0.24	71.7012
	GFHK99var PA K26E	3	2	1	170.625	0.404583	120.871
	GFHK99var PA K26E	3	3	1	214.583	0.470417	140.539
	GFHK99var PA K26E	10	1	1	511.042	0.396667	118.506
	GFHK99var PA K26E	10	2	1	695.625	0.5825	174.025
	GFHK99var PA K26E	10	3	1	460.833	0.354583	105.934
	GFHK99var	0	4	1	0.004125	0.00691667
	GFHK99var	0	5	1	0.00583333	0.00666667
	GFHK99var	0	6	1	0.00754167	0.00633333
	GFHK99var	0.03	1	1	0.0508333	0.0166667	2.51
	GFHK99var	0.03	2	1	0.03875	0.0120833	1.82
	GFHK99var	0.03	3	1	0.0520833	0.0108333	1.63
	GFHK99var	0.1	1	1	0.220833	0.0216667	3.26
	GFHK99var	0.1	2	1	0.206667	0.00929167	1.4
	GFHK99var	0.1	3	1	0.214583	0.00691667	1.04
	GFHK99var	0.3	1	1	1.35833	0.0233333	3.51
	GFHK99var	0.3	2	1	1.00375	0.01375	2.07
	GFHK99var	0.3	3	1	2.4	0.05375	8.1
	GFHK99var	1	1	1	20.7542	0.11375	17.13
	GFHK99var	1	2	1	7.69167	0.0566667	8.54
	GFHK99var	1	3	1	18.0917	0.139167	20.96
	GFHK99var	3	1	1	203.75	0.3825	57.62
	GFHK99var	3	2	1	99.25	0.172083	25.92
	GFHK99var	3	3	1	188.333	0.363333	54.73
	GFHK99var	10	1	1	1184.38	0.53375	80.4
	GFHK99var	10	2	1	968.958	0.419167	63.14
	GFHK99var	10	3	1	1512.5	0.699583	105.38
	GFHK99var PA K26E	0	1	2	0.00304167	0.00225
	GFHK99var PA K26E	0	2	2	0.002	0.00466667
	GFHK99var PA K26E	0	3	2	0.00329167	0.001
	GFHK99var PA K26E	0.03	1	2	0.473333	0.0133333	5.05263
	GFHK99var PA K26E	0.03	2	2	0.482083	0.00529167	2.00526
	GFHK99var PA K26E	0.03	3	2	0.271667	0.00608333	2.30526
	GFHK99var PA K26E	0.1	1	2	1.00125	0.0125	4.73684
	GFHK99var PA K26E	0.1	2	2	1.5875	0.0120833	4.57895
	GFHK99var PA K26E	0.1	3	2	1.28333	0.0158333	6
	GFHK99var PA K26E	0.3	1	2	2.81667	0.0141667	5.36842
	GFHK99var PA K26E	0.3	2	2	4.7125	0.0175	6.63158
	GFHK99var PA K26E	0.3	3	2	8.40417	0.0416667	15.7895
	GFHK99var PA K26E	1	1	2	20.3167	0.0779167	29.5263
	GFHK99var PA K26E	1	2	2	29.9583	0.115833	43.8947
	GFHK99var PA K26E	1	3	2	7.02917	0.0170833	6.47368
	GFHK99var PA K26E	3	1	2	61.9583	0.186667	70.7368
	GFHK99var PA K26E	3	2	2	50.25	0.137917	52.2632
	GFHK99var PA K26E	3	3	2	33.4583	0.05875	22.2632
	GFHK99var PA K26E	10	1	2	123	0.10125	38.3684
	GFHK99var PA K26E	10	2	2	197.917	0.16375	62.0526
	GFHK99var PA K26E	10	3	2	145.625	0.143333	54.3158
	GFHK99var	0	4	2	0.005	0.00308333
	GFHK99var	0	5	2	0.00208333	0.00145833
	GFHK99var	0	6	2	0.00345833	0.00420833
	GFHK99var	0.03	1	2	0.00795833	0.00191667	0.657143
	GFHK99var	0.03	2	2	0.00954167	0.00295833	1.01429
	GFHK99var	0.03	3	2	0.0102917	0.003375	1.15714
	GFHK99var	0.1	1	2	0.04625	0.00220833	0.757143
	GFHK99var	0.1	2	2	0.0225	0.00204167	0.7
	GFHK99var	0.1	3	2	0.0541667	0.0117917	4.04286
	GFHK99var	0.3	1	2	0.4525	0.0175	6
	GFHK99var	0.3	2	2	0.1025	0.00270833	0.928571
	GFHK99var	0.3	3	2	0.134167	0.00225	0.771429
	GFHK99var	1	1	2	5.62917	0.03	10.2857
	GFHK99var	1	2	2	2.99583	0.0229167	7.85714
	GFHK99var	1	3	2	6.6875	0.0283333	9.71429
	GFHK99var	3	1	2	55.5417	0.130833	44.8571
	GFHK99var	3	2	2	17.6167	0.0345833	11.8571
	GFHK99var	3	3	2	24.9333	0.0491667	16.8571
	GFHK99var	10	1	2	206.667	0.120417	41.2857
	GFHK99var	10	2	2	192.292	0.104583	35.8571
	GFHK99var	10	3	2	120.042	0.0633333	21.7143

## Sheet: Fig 4, S2 Fig, S3 Fig 
	Coinfecting Virus	Var Dose (GC)	Guinea Pig ID	Time (d)	WT Titer (GC/mL nasal lavage)	Var Titer (GC/mL nasal lavage)
Fig 4A	GFHK99var	0	1	1	4762	4762	GFHK99wt Dose = 10^3 GC
S2A Fig	GFHK99var	0	2	1	4762	4762
	GFHK99var	0	3	1	4762	4762
	GFHK99var	0	4	1	4762	4762
	GFHK99var	100	5	1	4762	4762
	GFHK99var	100	6	1	4762	4762
	GFHK99var	100	7	1	4762	4762
	GFHK99var	100	8	1	4762	4762
	GFHK99var	1000	9	1	4762	4762
	GFHK99var	1000	10	1	4762	4762
	GFHK99var	1000	11	1	4762	4762
	GFHK99var	1000	12	1	4762	4762
	GFHK99var	10000	13	1	4762	4762
	GFHK99var	10000	14	1	4762	4762
	GFHK99var	10000	15	1	4762	4762
	GFHK99var	10000	16	1	4762	4762
	GFHK99var	100000	17	1	4762	15833.3
	GFHK99var	100000	18	1	4762	13809.5
	GFHK99var	100000	19	1	4762	9047.62
	GFHK99var	100000	20	1	4762	4762
	GFHK99var	0	1	2	12738.1	4762
	GFHK99var	0	2	2	4762	4762
	GFHK99var	0	3	2	273810	4762
	GFHK99var	0	4	2	4762	4762
	GFHK99var	100	5	2	4762	4762
	GFHK99var	100	6	2	4762	4762
	GFHK99var	100	7	2	4762	4762
	GFHK99var	100	8	2	8571.43	4762
	GFHK99var	1000	9	2	4762	4762
	GFHK99var	1000	10	2	4762	4762
	GFHK99var	1000	11	2	4762	4762
	GFHK99var	1000	12	2	4762	4762
	GFHK99var	10000	13	2	4762	4762
	GFHK99var	10000	14	2	4762	52381
	GFHK99var	10000	15	2	4762	4762
	GFHK99var	10000	16	2	5595.24	4762
	GFHK99var	100000	17	2	4762	729762
	GFHK99var	100000	18	2	4762	2.21786e+06
	GFHK99var	100000	19	2	4762	494048
	GFHK99var	100000	20	2	4762	78571.4
	GFHK99var	0	1	3	7738.1	7619.05
	GFHK99var	0	2	3	4762	4762
	GFHK99var	0	3	3	1.60714e+06	4762
	GFHK99var	0	4	3	7380.95	4762
	GFHK99var	100	5	3	7976.19	4762
	GFHK99var	100	6	3	4762	4762
	GFHK99var	100	7	3	4762	4762
	GFHK99var	100	8	3	185714	141667
	GFHK99var	1000	9	3	26190.5	4762
	GFHK99var	1000	10	3	4762	4762
	GFHK99var	1000	11	3	4762	4762
	GFHK99var	1000	12	3	4762	4762
	GFHK99var	10000	13	3	7380.95	16071.4
	GFHK99var	10000	14	3	4762	444048
	GFHK99var	10000	15	3	4762	5.59524e+06
	GFHK99var	10000	16	3	310714	820238
	GFHK99var	100000	17	3	4762	2.17262e+06
	GFHK99var	100000	18	3	4762	1.9619e+06
	GFHK99var	100000	19	3	4762	3250000
	GFHK99var	100000	20	3	4762	1.20357e+06
	GFHK99var	0	1	4	145238	17142.9
	GFHK99var	0	2	4	5238.1	4762
	GFHK99var	0	3	4	8.14286e+06	4762
	GFHK99var	0	4	4	200000	8333.33
	GFHK99var	100	5	4	12261.9	9047.62
	GFHK99var	100	6	4	65476.2	82142.9
	GFHK99var	100	7	4	5833.33	1.05714e+06
	GFHK99var	100	8	4	510714	2.29405e+06
	GFHK99var	1000	9	4	39285.7	111905
	GFHK99var	1000	10	4	10238.1	207143
	GFHK99var	1000	11	4	152381	567857
	GFHK99var	1000	12	4	67857.1	95238.1
	GFHK99var	10000	13	4	4762	117857
	GFHK99var	10000	14	4	4762	714286
	GFHK99var	10000	15	4	26547.6	1.1631e+06
	GFHK99var	10000	16	4	1.39048e+06	784524
	GFHK99var	100000	17	4	1.14167e+06	2.50595e+06
	GFHK99var	100000	18	4	4762	1.70595e+06
	GFHK99var	100000	19	4	16190.5	1.69405e+07
	GFHK99var	100000	20	4	12500	1.65595e+07
	GFHK99var	0	1	5	1.73929e+06	4762
	GFHK99var	0	2	5	4762	4762
	GFHK99var	0	3	5	7.47619e+06	4762
	GFHK99var	0	4	5	332143	4762
	GFHK99var	100	5	5	70238.1	4762
	GFHK99var	100	6	5	16071.4	4762
	GFHK99var	100	7	5	4762	4762
	GFHK99var	100	8	5	5.57143e+06	4.34524e+06
	GFHK99var	1000	9	5	5476.19	4762
	GFHK99var	1000	10	5	4762	4762
	GFHK99var	1000	11	5	507143	1.04762e+06
	GFHK99var	1000	12	5	4762	4762
	GFHK99var	10000	13	5	4762	1.35357e+06
	GFHK99var	10000	14	5	4762	1.13214e+06
	GFHK99var	10000	15	5	91666.7	2.28929e+06
	GFHK99var	10000	16	5	3.61905e+06	3125000
	GFHK99var	100000	17	5	4762	6.5119e+06
	GFHK99var	100000	18	5	4762	3000000
	GFHK99var	100000	19	5	4762	5.59524e+06
	GFHK99var	100000	20	5	4762	1.74167e+06
	GFHK99var	0	1	6	9.28571e+06	4762
	GFHK99var	0	2	6	4762	4762
	GFHK99var	0	3	6	3.06667e+06	4762
	GFHK99var	0	4	6	820238	4762
	GFHK99var	100	5	6	840476	4762
	GFHK99var	100	6	6	59523.8	4762
	GFHK99var	100	7	6	4762	4762
	GFHK99var	100	8	6	751190	1.48929e+06
	GFHK99var	1000	9	6	26071.4	4762
	GFHK99var	1000	10	6	4762	4762
	GFHK99var	1000	11	6	2.31786e+06	5.44048e+06
	GFHK99var	1000	12	6	4762	226190
	GFHK99var	10000	13	6	4762	3.59405e+06
	GFHK99var	10000	14	6	4762	3.7381e+06
	GFHK99var	10000	15	6	84523.8	3.00119e+06
	GFHK99var	10000	16	6	910714	952381
	GFHK99var	100000	17	6	4762	1.3631e+06
	GFHK99var	100000	18	6	4762	1.1369e+06
	GFHK99var	100000	19	6	4762	6.69048e+06
	GFHK99var	100000	20	6	4762	1.28452e+06
Fig 4B	GFHK99 PA K26E	0	22	1	8214.29	4762	GFHK99wt Dose = 10^3 GC
S2B Fig	GFHK99 PA K26E	0	23	1	4762	4762
	GFHK99 PA K26E	0	24	1	5119.05	4762
	GFHK99 PA K26E	100	25	1	17023.8	18809.5
	GFHK99 PA K26E	100	26	1	30476.2	39285.7
	GFHK99 PA K26E	100	27	1	18571.4	9404.76
	GFHK99 PA K26E	100	28	1	4762	67857.1
	GFHK99 PA K26E	1000	29	1	6071.43	261905
	GFHK99 PA K26E	1000	30	1	27857.1	523810
	GFHK99 PA K26E	1000	31	1	4762	148810
	GFHK99 PA K26E	1000	32	1	4762	514286
	GFHK99 PA K26E	10000	33	1	14047.6	710714
	GFHK99 PA K26E	10000	34	1	72619	5.84524e+06
	GFHK99 PA K26E	10000	35	1	45238.1	1.62738e+06
	GFHK99 PA K26E	10000	36	1	12976.2	1.61667e+06
	GFHK99 PA K26E	100000	37	1	11071.4	1.32976e+06
	GFHK99 PA K26E	100000	38	1	24166.7	3.14524e+06
	GFHK99 PA K26E	100000	39	1	28690.5	4.20238e+06
	GFHK99 PA K26E	100000	40	1	12023.8	2.61429e+06
	GFHK99 PA K26E	0	22	2	273810	4762
	GFHK99 PA K26E	0	23	2	357143	4762
	GFHK99 PA K26E	0	24	2	520238	4762
	GFHK99 PA K26E	100	25	2	645238	713095
	GFHK99 PA K26E	100	26	2	1.68095e+06	2.40833e+06
	GFHK99 PA K26E	100	27	2	1.11786e+06	2.05357e+06
	GFHK99 PA K26E	100	28	2	144048	1.74881e+06
	GFHK99 PA K26E	1000	29	2	4762	4762
	GFHK99 PA K26E	1000	30	2	65476.2	1.31429e+06
	GFHK99 PA K26E	1000	31	2	103571	6.55952e+06
	GFHK99 PA K26E	1000	32	2	122619	3.2119e+06
	GFHK99 PA K26E	10000	33	2	25833.3	988095
	GFHK99 PA K26E	10000	34	2	45238.1	3.30119e+06
	GFHK99 PA K26E	10000	35	2	34881	1925000
	GFHK99 PA K26E	10000	36	2	27142.9	4.35238e+06
	GFHK99 PA K26E	100000	37	2	4762	435714
	GFHK99 PA K26E	100000	38	2	5238.1	2.09762e+06
	GFHK99 PA K26E	100000	39	2	30833.3	7.70238e+06
	GFHK99 PA K26E	100000	40	2	26071.4	4.85714e+06
	GFHK99 PA K26E	0	22	3	273810	4762
	GFHK99 PA K26E	0	23	3	357143	4762
	GFHK99 PA K26E	0	24	3	520238	4762
	GFHK99 PA K26E	100	25	3	645238	713095
	GFHK99 PA K26E	100	26	3	1.68095e+06	2.40833e+06
	GFHK99 PA K26E	100	27	3	1.11786e+06	2.05357e+06
	GFHK99 PA K26E	100	28	3	144048	1.74881e+06
	GFHK99 PA K26E	1000	29	3	4762	4762
	GFHK99 PA K26E	1000	30	3	65476.2	1.31429e+06
	GFHK99 PA K26E	1000	31	3	103571	6.55952e+06
	GFHK99 PA K26E	1000	32	3	122619	3.2119e+06
	GFHK99 PA K26E	10000	33	3	25833.3	988095
	GFHK99 PA K26E	10000	34	3	45238.1	3.30119e+06
	GFHK99 PA K26E	10000	35	3	34881	1925000
	GFHK99 PA K26E	10000	36	3	27142.9	4.35238e+06
	GFHK99 PA K26E	100000	37	3	4762	435714
	GFHK99 PA K26E	100000	38	3	5238.1	2.09762e+06
	GFHK99 PA K26E	100000	39	3	30833.3	7.70238e+06
	GFHK99 PA K26E	100000	40	3	26071.4	4.85714e+06
	GFHK99 PA K26E	0	22	4	1.3119e+06	4762
	GFHK99 PA K26E	0	23	4	1.24762e+06	4762
	GFHK99 PA K26E	0	24	4	1350000	72619
	GFHK99 PA K26E	100	25	4	335714	733333
	GFHK99 PA K26E	100	26	4	402381	598810
	GFHK99 PA K26E	100	27	4	346429	1.34405e+06
	GFHK99 PA K26E	100	28	4	417857	2.02262e+07
	GFHK99 PA K26E	1000	29	4	7857.14	121429
	GFHK99 PA K26E	1000	30	4	11190.5	170238
	GFHK99 PA K26E	1000	31	4	69047.6	1.86786e+06
	GFHK99 PA K26E	1000	32	4	57142.9	6.83333e+06
	GFHK99 PA K26E	10000	33	4	17976.2	819048
	GFHK99 PA K26E	10000	34	4	4880.95	128571
	GFHK99 PA K26E	10000	35	4	19761.9	1.29881e+06
	GFHK99 PA K26E	10000	36	4	4762	460714
	GFHK99 PA K26E	100000	37	4	4762	380952
	GFHK99 PA K26E	100000	38	4	4762	11547.6
	GFHK99 PA K26E	100000	39	4	4762	4762
	GFHK99 PA K26E	100000	40	4	4762	79761.9
	GFHK99 PA K26E	0	22	5	683333	4762
	GFHK99 PA K26E	0	23	5	679762	4762
	GFHK99 PA K26E	0	24	5	1.18214e+06	4762
	GFHK99 PA K26E	100	25	5	85714.3	253571
	GFHK99 PA K26E	100	26	5	28928.6	38095.2
	GFHK99 PA K26E	100	27	5	28452.4	88095.2
	GFHK99 PA K26E	100	28	5	5714.29	165476
	GFHK99 PA K26E	1000	29	5	127381	1.31667e+07
	GFHK99 PA K26E	1000	30	5	4762	36547.6
	GFHK99 PA K26E	1000	31	5	4762	85714.3
	GFHK99 PA K26E	1000	32	5	4762	316667
	GFHK99 PA K26E	10000	33	5	5000	111905
	GFHK99 PA K26E	10000	34	5	4762	134524
	GFHK99 PA K26E	10000	35	5	4762	101190
	GFHK99 PA K26E	10000	36	5	4762	151190
	GFHK99 PA K26E	100000	37	5	25000	2.57857e+06
	GFHK99 PA K26E	100000	38	5	4762	6785.71
	GFHK99 PA K26E	100000	39	5	4762	159524
	GFHK99 PA K26E	100000	40	5	4762	138095
	GFHK99 PA K26E	0	22	6	339286	20238.1
	GFHK99 PA K26E	0	23	6	70238.1	16904.8
	GFHK99 PA K26E	0	24	6	265476	16428.6
	GFHK99 PA K26E	100	25	6	6666.67	30000
	GFHK99 PA K26E	100	26	6	12619	25833.3
	GFHK99 PA K26E	100	27	6	45238.1	198810
	GFHK99 PA K26E	100	28	6	4762	55952.4
	GFHK99 PA K26E	1000	29	6	31071.4	2.27381e+06
	GFHK99 PA K26E	1000	30	6	4762	57142.9
	GFHK99 PA K26E	1000	31	6	4762	38809.5
	GFHK99 PA K26E	1000	32	6	4762	88095.2
	GFHK99 PA K26E	10000	33	6	4762	91666.7
	GFHK99 PA K26E	10000	34	6	4762	82142.9
	GFHK99 PA K26E	10000	35	6	4762	122619
	GFHK99 PA K26E	10000	36	6	4762	211905
	GFHK99 PA K26E	100000	37	6	4762	514286
	GFHK99 PA K26E	100000	38	6	4762	42857.1
	GFHK99 PA K26E	100000	39	6	4762	4762
	GFHK99 PA K26E	100000	40	6	4762	182143
	Coinfecting Virus	Pre-wt Inoc. Time (h)	Guinea Pig ID	Time (d)	WT Titer (GC/mL nasal lavage)	Var Titer (GC/mL nasal lavage)
Fig 4C,D	GFHK99var	N/A	41	1	4762	4762	GFHK99wt Dose = 10^4 GC
S3A,B Fig	GFHK99var	N/A	42	1	4762	7619.05	GFHK99var Dose = 10^4 GC
	GFHK99var	N/A	43	1	4762	4762	GFHK99 PA K26E Dose = 10^4 GC
	GFHK99var	N/A	44	1	4762	4762
	GFHK99var	-12	45	1	4762	4762
	GFHK99var	-12	46	1	4762	46428.6
	GFHK99var	-12	47	1	4762	20952.4
	GFHK99var	-12	48	1	4762	60714.3
	GFHK99var	-24	49	1	4762	35714.3
	GFHK99var	-24	50	1	4762	82142.9
	GFHK99var	-24	51	1	4762	44047.6
	GFHK99var	-24	52	1	4762	798810
	GFHK99 PA K26E	-12	53	1	4762	210714
	GFHK99 PA K26E	-12	54	1	4762	358333
	GFHK99 PA K26E	-12	55	1	4762	6428.57
	GFHK99 PA K26E	-12	56	1	4762	311905
	GFHK99 PA K26E	-24	57	1	4762	2.32381e+06
	GFHK99 PA K26E	-24	58	1	4762	2.55476e+06
	GFHK99 PA K26E	-24	59	1	4762	5.7619e+06
	GFHK99 PA K26E	-24	60	1	4762	4.02381e+06
	GFHK99var	N/A	41	2	8809.52	4762
	GFHK99var	N/A	42	2	4762	6428.57
	GFHK99var	N/A	43	2	8095.24	5238.1
	GFHK99var	N/A	44	2	44047.6	4762
	GFHK99var	-12	45	2	4762	4762
	GFHK99var	-12	46	2	5833.33	239286
	GFHK99var	-12	47	2	32142.9	1.05833e+06
	GFHK99var	-12	48	2	10357.1	2.50476e+06
	GFHK99var	-24	49	2	4762	4762
	GFHK99var	-24	50	2	4762	222619
	GFHK99var	-24	51	2	8095.24	119048
	GFHK99var	-24	52	2	26309.5	9.79762e+06
	GFHK99 PA K26E	-12	53	2	5714.29	2.65833e+06
	GFHK99 PA K26E	-12	54	2	4762	98809.5
	GFHK99 PA K26E	-12	55	2	54761.9	1.59881e+06
	GFHK99 PA K26E	-12	56	2	4762	1.44167e+06
	GFHK99 PA K26E	-24	57	2	4762	1.49048e+06
	GFHK99 PA K26E	-24	58	2	12976.2	1.74762e+06
	GFHK99 PA K26E	-24	59	2	6309.52	1.86905e+07
	GFHK99 PA K26E	-24	60	2	8333.33	1.33571e+06
	GFHK99var	N/A	41	3	202381	4762
	GFHK99var	N/A	42	3	133333	4762
	GFHK99var	N/A	43	3	4762	4762
	GFHK99var	N/A	44	3	307143	4762
	GFHK99var	-12	45	3	4762	4762
	GFHK99var	-12	46	3	30952.4	482143
	GFHK99var	-12	47	3	48809.5	539286
	GFHK99var	-12	48	3	29047.6	7.17857e+06
	GFHK99var	-24	49	3	28809.5	4762
	GFHK99var	-24	50	3	4762	797619
	GFHK99var	-24	51	3	107143	3.42857e+07
	GFHK99var	-24	52	3	46428.6	2.89167e+07
	GFHK99 PA K26E	-12	53	3	4762	1.35238e+06
	GFHK99 PA K26E	-12	54	3	25000	1.32976e+07
	GFHK99 PA K26E	-12	55	3	783333	9.16667e+06
	GFHK99 PA K26E	-12	56	3	9523.81	3.92262e+07
	GFHK99 PA K26E	-24	57	3	4762	615476
	GFHK99 PA K26E	-24	58	3	14047.6	2.32143e+06
	GFHK99 PA K26E	-24	59	3	4762	5.09524e+06
	GFHK99 PA K26E	-24	60	3	4762	2.1881e+06
	GFHK99var	N/A	41	4	473810	4762
	GFHK99var	N/A	42	4	688095	4762
	GFHK99var	N/A	43	4	9.9881e+06	4762
	GFHK99var	N/A	44	4	1.11667e+07	4762
	GFHK99var	-12	45	4	4762	31071.4
	GFHK99var	-12	46	4	70238.1	863095
	GFHK99var	-12	47	4	172619	2650000
	GFHK99var	-12	48	4	4762	260714
	GFHK99var	-24	49	4	121429	4762
	GFHK99var	-24	50	4	4762	4762
	GFHK99var	-24	51	4	18571.4	935714
	GFHK99var	-24	52	4	4762	1.80357e+06
	GFHK99 PA K26E	-12	53	4	4762	30952.4
	GFHK99 PA K26E	-12	54	4	9761.9	2.72024e+06
	GFHK99 PA K26E	-12	55	4	8095.24	741667
	GFHK99 PA K26E	-12	56	4	4762	314286
	GFHK99 PA K26E	-24	57	4	4762	120238
	GFHK99 PA K26E	-24	58	4	7976.19	208333
	GFHK99 PA K26E	-24	59	4	4762	360714
	GFHK99 PA K26E	-24	60	4	4762	526190
	GFHK99var	N/A	41	5	51190.5	4762
	GFHK99var	N/A	42	5	176190	4762
	GFHK99var	N/A	43	5	316667	4762
	GFHK99var	N/A	44	5	5.57143e+06	4762
	GFHK99var	-12	45	5	4762	4762
	GFHK99var	-12	46	5	101190	1250000
	GFHK99var	-12	47	5	341667	1.03571e+07
	GFHK99var	-12	48	5	5238.1	2.3119e+06
	GFHK99var	-24	49	5	155952	4762
	GFHK99var	-24	50	5	4762	408333
	GFHK99var	-24	51	5	44047.6	2.87024e+06
	GFHK99var	-24	52	5	17500	9.02381e+06
	GFHK99 PA K26E	-12	53	5	7142.86	821429
	GFHK99 PA K26E	-12	54	5	8452.38	3.69048e+06
	GFHK99 PA K26E	-12	55	5	292857	1.21071e+07
	GFHK99 PA K26E	-12	56	5	7261.9	8.54762e+06
	GFHK99 PA K26E	-24	57	5	4762	127381
	GFHK99 PA K26E	-24	58	5	10000	1.98452e+06
	GFHK99 PA K26E	-24	59	5	4762	2.20238e+07
	GFHK99 PA K26E	-24	60	5	4762	59523.8
	GFHK99var	N/A	41	6	47619	4762
	GFHK99var	N/A	42	6	1.67857e+06	4762
	GFHK99var	N/A	43	6	6.5119e+06	4762
	GFHK99var	N/A	44	6	4.89286e+06	4762
	GFHK99var	-12	45	6	4762	853571
	GFHK99var	-12	46	6	14166.7	130952
	GFHK99var	-12	47	6	79761.9	1.44524e+06
	GFHK99var	-12	48	6	4762	153571
	GFHK99var	-24	49	6	947619	8095.24
	GFHK99var	-24	50	6	4762	11547.6
	GFHK99var	-24	51	6	4762	122619
	GFHK99var	-24	52	6	4762	504762
	GFHK99 PA K26E	-12	53	6	4762	14047.6
	GFHK99 PA K26E	-12	54	6	4762	92857.1
	GFHK99 PA K26E	-12	55	6	27619	1.10357e+06
	GFHK99 PA K26E	-12	56	6	6428.57	184524
	GFHK99 PA K26E	-24	57	6	4762	10476.2
	GFHK99 PA K26E	-24	58	6	4762	4762
	GFHK99 PA K26E	-24	59	6	4762	260714
	GFHK99 PA K26E	-24	60	6	4762	6071.43

## Sheet: Fig 5
Fig 5	Coinfecting Virus	Location	Replicate	Experiment	Coinfecting virus vRNA copy no. per cell	GFHK99wt vRNA copy no. per cell	Relative GFHK99wt vRNA copy no.
	N/A	Cell	1	1	0.00963348	9.34003	1.0542	GFHK99wt MOI = 0.1 GC/cell
	N/A	Cell	2	1	0	8.37965	0.945801	GFHK99var MOI = 8 GC/cell
	N/A	Cell	1	2	0	3.00268	0.575568	GFHK99 PA K26E MOI = 8 GC/cell
	N/A	Cell	2	2	0	7.43112	1.42443
	N/A	Progeny	1	1	12.1212	2018.18	1.2572
	N/A	Progeny	2	1	6.06061	1192.42	0.742803
	N/A	Progeny	1	2	0	469.697	1.49758
	N/A	Progeny	2	2	60.6061	157.576	0.502415
	GFHK99Var	Cell	1	1	73.5109	6.48852	0.73
	GFHK99Var	Cell	2	1	0	9.07029	1.02
	GFHK99Var	Cell	1	2	489.826	4.0846	0.78
	GFHK99Var	Cell	2	2	368.295	3.54809	0.68
	GFHK99Var	Progeny	1	1	499242	38651.5	24.08
	GFHK99Var	Progeny	2	1	590152	46787.9	29.15
	GFHK99Var	Progeny	1	2	430303	3766.67	12.01
	GFHK99Var	Progeny	2	2	411364	2527.27	8.06
	GFHK99 PA K26E	Cell	1	1	127.829	18.5259	2.091
	GFHK99 PA K26E	Cell	2	1	201.117	27.4184	3.09468
	GFHK99 PA K26E	Cell	1	2	633.587	9.24814	1.77
	GFHK99 PA K26E	Cell	2	2	353.475	3.4147	0.65
	GFHK99 PA K26E	Progeny	1	1	1.02727e+06	94409.1	58.81
	GFHK99 PA K26E	Progeny	2	1	1.1803e+06	132727	82.68
	GFHK99 PA K26E	Progeny	1	2	1350000	14000	44.64
	GFHK99 PA K26E	Progeny	2	2	1.20606e+06	14090.9	44.93
	N/A	Cell	1	3	0	0.773643	1.26392
	N/A	Cell	2	3	1.48504	0.450551	0.736077
	N/A	Cell	1	4	1.48207	1.34424	0.953363
	N/A	Cell	2	4	1.2153	1.48207	1.05112
	N/A	Cell	1	5	2.03785	51.6651	0.976472
	N/A	Cell	2	5	0	54.155	1.02353
	N/A	Progeny	1	3	333.333	3236.36	0.81589
	N/A	Progeny	2	3	5000	4696.97	1.18411
	N/A	Progeny	1	4	780.303	160.606	0.089983
	N/A	Progeny	2	4	78.7879	3409.09	1.91002
	N/A	Progeny	1	5	909.091	431.818	0.906191
	N/A	Progeny	2	5	696.97	521.212	1.09379
	MaMN99	Cell	1	3	693.018	8.24033	13.46
	MaMN99	Cell	2	3	698.353	7.60601	12.43
	MaMN99	Cell	1	4	15228.3	5.48367	3.88
	MaMN99	Cell	2	4	16992	5.45403	3.86
	MaMN99	Progeny	1	3	6.17576e+06	114606	28.89
	MaMN99	Progeny	2	3	8.37273e+06	138212	34.84
	MaMN99	Progeny	1	4	4.08864e+06	34272.7	19.2
	MaMN99	Progeny	2	4	9.12879e+06	49681.8	27.84
	NL09	Cell	1	3	622.768	2.40096	3.92
	NL09	Cell	2	3	662.784	3.70519	6.05
	NL09	Cell	1	4	3330.96	0.432766	0.31
	NL09	Cell	2	4	2379.47	0.277148	0.2
	NL09	Cell	1	5	28567	137.922	2.61
	NL09	Cell	2	5	33791.3	129.859	2.45
	NL09	Progeny	1	3	7.79394e+06	74030.3	18.66
	NL09	Progeny	2	3	1.03212e+07	138364	34.88
	NL09	Progeny	1	4	7.14394e+06	11727.3	6.57
	NL09	Progeny	2	4	9.23485e+06	19848.5	11.12
	NL09	Progeny	1	5	1.08485e+07	73136.4	153.48
	NL09	Progeny	2	5	8.00152e+06	54257.6	113.86

## Sheet: Fig 6
	Coinfecting Virus	Time (h)	Replicate	Experiment	WT Titer (GC/mL)	Var Titer (GC/mL)
Fig 6A	N/A	12	1	1	0.04	0	GFHK99wt MOI = 0.005 GC/cell
	N/A	12	2	1	0.06	0	GFHK99var MOI = 0.1 GC/cell
	N/A	12	3	1	0.08	0	GFHK99 PA K26E MOI = 0.1 GC/cell
	GFHK99var	12	1	1	0.05	1.71
	GFHK99var	12	2	1	0.02	1.08
	GFHK99var	12	3	1	0.06	2.09
	GFHK99 PA K26E	12	1	1	0.1	18.31
	GFHK99 PA K26E	12	2	1	0.03	8.54
	GFHK99 PA K26E	12	3	1	0.12	15.54
	N/A	24	1	1	3.18	0.02
	N/A	24	2	1	2.19	0.01
	N/A	24	3	1	3.74	0.01
	GFHK99var	24	1	1	3.91	101.65
	GFHK99var	24	2	1	3.74	133.33
	GFHK99var	24	3	1	3.33	96.83
	GFHK99 PA K26E	24	1	1	11.64	1061.67
	GFHK99 PA K26E	24	2	1	2.08	908.96
	GFHK99 PA K26E	24	3	1	7.17	969.17
	N/A	48	1	1	39.83	0.1
	N/A	48	2	1	32	0.06
	N/A	48	3	1	29.46	0.1
	GFHK99var	48	1	1	8.2	286.98
	GFHK99var	48	2	1	21.36	987.5
	GFHK99var	48	3	1	16.47	550.42
	GFHK99 PA K26E	48	1	1	2.38	620.21
	GFHK99 PA K26E	48	2	1	2.69	1073.54
	GFHK99 PA K26E	48	3	1	0.92	104.17
Fig 6B	N/A	12	1	2	0.06	0.01	GFHK99wt MOI = 0.005 GC/cell
	N/A	12	2	2	0.06	0.01	GFHK99var MOI = 0.1 GC/cell
	N/A	12	3	2	0.06	0.01	GFHK99 PA K26E MOI = 0.1 GC/cell
	GFHK99var	12	1	2	0.05	0.46
	GFHK99var	12	2	2	0.05	0.57
	GFHK99var	12	3	2	0.07	0.59
	GFHK99 PA K26E	12	1	2	0.09	15.79
	GFHK99 PA K26E	12	2	2	0.16	19.88
	GFHK99 PA K26E	12	3	2	0.13	19.92
	N/A	24	1	2	17.92	0.1
	N/A	24	2	2	9.75	0.1
	N/A	24	3	2	8.77	0.05
	GFHK99var	24	1	2	13.91	83.75
	GFHK99var	24	2	2	5.59	83.96
	GFHK99var	24	3	2	8.38	88.79
	GFHK99 PA K26E	24	1	2	20.85	1828.75
	GFHK99 PA K26E	24	2	2	7.94	1607.08
	GFHK99 PA K26E	24	3	2	9.25	1918.33
	N/A	36	1	2	682.92	0.02
	N/A	36	2	2	418.33	0.01
	N/A	36	3	2	362.92	0.01
	GFHK99var	36	1	2	213.08	904.17
	GFHK99var	36	2	2	155.04	723.75
	GFHK99var	36	3	2	174.58	515
	GFHK99 PA K26E	36	1	2	8.98	1046.25
	GFHK99 PA K26E	36	2	2	15.08	1500.42
	GFHK99 PA K26E	36	3	2	8.2	1333.33
	N/A	48	1	2	950	0.17
	N/A	48	2	2	791.67	0.01
	N/A	48	3	2	883.33	0.16
	GFHK99var	48	1	2	169	449.17
	GFHK99var	48	2	2	170.13	772.08
	GFHK99var	48	3	2	218.5	695.42
	GFHK99 PA K26E	48	1	2	4.36	911.25
	GFHK99 PA K26E	48	2	2	12.84	1224.58
	GFHK99 PA K26E	48	3	2	12.67	1608.33
	Coinfecting Virus	Pre-wt Infect Time (h)	Replicate	Experiment	Coinfecting virus vRNA copy no. per cell	GFHK99wt vRNA copy no. per cell	Relative GFHK99wt vRNA copy no.
Fig 6C	N/A	N/A	1	1	0	0		GFHK99wt MOI = 0.005 GC/cell
	N/A	N/A	2	1	0.260417	0.51		GFHK99var MOI = 1 GC/cell
	N/A	N/A	3	1	0	1.64167		GFHK99 PA K26E MOI = 1 GC/cell
	GFHK99var	0	1	1	2729.17	1.39167	1.29
	GFHK99var	0	2	1	2611.46	1.08208	1.01
	GFHK99var	0	3	1	2685.42	1.22917	1.14
	GFHK99var	4	1	1	2842.71	1.23708	1.15
	GFHK99var	4	2	1	2853.12	1.29333	1.2
	GFHK99var	4	3	1	2903.12	1.54167	1.43
	GFHK99var	8	1	1	2571.88	0.690833	0.64
	GFHK99var	8	2	1	1913.54	0.440833	0.41
	GFHK99var	8	3	1	3243.75	0.8825	0.82
	GFHK99var	12	1	1	2368.75	0.09125	0.08
	GFHK99var	12	2	1	2314.58	0.184583	0.17
	GFHK99var	12	3	1	3577.08	0.164167	0.15
	GFHK99var	24	1	1	737.5	0.014625	0.01
	GFHK99var	24	2	1	1002.08	0.00625	0.01
	GFHK99var	24	3	1	1043.75	0.0533333	0.05
	N/A	N/A	4	1	0	0
	N/A	N/A	5	1	0.0729167	0.583333
	N/A	N/A	6	1	0	1.82083
	GFHK99 PA K26E	0	1	1	1515.63	1.3625	1.13
	GFHK99 PA K26E	0	2	1	978.125	0.831667	0.69
	GFHK99 PA K26E	0	3	1	1630.21	1.4875	1.24
	GFHK99 PA K26E	4	1	1	1520.83	1.24375	1.03
	GFHK99 PA K26E	4	2	1	1372.92	1.3	1.08
	GFHK99 PA K26E	4	3	1	901.042	1.30833	1.09
	GFHK99 PA K26E	8	1	1	725	0.4225	0.35
	GFHK99 PA K26E	8	2	1	986.458	0.390417	0.32
	GFHK99 PA K26E	8	3	1	1437.5	0.732917	0.61
	GFHK99 PA K26E	12	1	1	1267.71	0.440417	0.37
	GFHK99 PA K26E	12	2	1	1460.42	0.535	0.45
	GFHK99 PA K26E	12	3	1	1269.79	0.379583	0.32
	GFHK99 PA K26E	24	1	1	758.333	0.0658333	0.05
	GFHK99 PA K26E	24	2	1	1030.21	0.147083	0.12
	GFHK99 PA K26E	24	3	1	1016.67	0.104583	0.09
Fig 6D	N/A	N/A	1	1	0.0333333	0.565833		GFHK99wt MOI = 0.005 GC/cell
	N/A	N/A	2	1	0.0666667	0.369167		GFHK99var MOI = 10 GC/cell
	N/A	N/A	3	1	0	0.645833		GFHK99 PA K26E MOI = 10 GC/cell
	GFHK99var	0	1	1	2242.92	0.64	1.26
	GFHK99var	0	2	1	1319.58	0.3525	0.69
	GFHK99var	0	3	1	2192.5	0.675833	1.33
	GFHK99var	4	1	1	3729.17	0.485	0.96
	GFHK99var	4	2	1	1452.5	0.275833	0.54
	GFHK99var	4	3	1	3333.33	0.519167	1.02
	GFHK99var	8	1	1	3700	0.205417	0.4
	GFHK99var	8	2	1	1130.83	0.08625	0.17
	GFHK99var	8	3	1	2737.5	0.212917	0.42
	GFHK99var	12	1	1	2489.58	0.0570833	0.11
	GFHK99var	12	2	1	720.833	0.03125	0.06
	GFHK99var	12	3	1	2351.25	0.0616667	0.12
	GFHK99var	24	1	1	1167.5	0.0441667	0.09
	GFHK99var	24	2	1	571.667	0.003125	0.01
	GFHK99var	24	3	1	904.167	0.00941667	0.02
	N/A	N/A	4	1	2.91667	0.643333
	N/A	N/A	5	1	0.0625	0.627083
	N/A	N/A	6	1	0.0583333	0.49375
	GFHK99 PA K26E	0	1	1	911.667	0.613333	1.09
	GFHK99 PA K26E	0	2	1	794.583	0.55625	0.99
	GFHK99 PA K26E	0	3	1	648.333	0.419167	0.75
	GFHK99 PA K26E	4	1	1	1205	0.340417	0.61
	GFHK99 PA K26E	4	2	1	1478.33	0.503333	0.9
	GFHK99 PA K26E	4	3	1	1532.5	0.44125	0.79
	GFHK99 PA K26E	8	1	1	986.25	0.169167	0.3
	GFHK99 PA K26E	8	2	1	822.5	0.116667	0.21
	GFHK99 PA K26E	8	3	1	913.75	0.18875	0.34
	GFHK99 PA K26E	12	1	1	899.583	0.0654167	0.12
	GFHK99 PA K26E	12	2	1	1140	0.11125	0.2
	GFHK99 PA K26E	12	3	1	1224.17	0.0791667	0.14
	GFHK99 PA K26E	24	1	1	281.25	0.0295833	0.05
	GFHK99 PA K26E	24	2	1	644.167	0.0733333	0.13
	GFHK99 PA K26E	24	3	1	739.583	0.0333333	0.06

## Sheet: S1 Fig
S1 Fig	Coinfecting Virus	Var MOI (GC/cell)	Replicate	Experiment	Coinfecting virus vRNA copy no. per cell	GFHK99wt vRNA copy no. per cell	Relative GFHK99wt vRNA copy no.
	NL09	0	1	1	0.0258333	2.28333		GFHK99wt MOI = 0.5 GC/Cell
	NL09	0	2	1	0.005	1.94167
	NL09	0	3	1	0.00416667	4.46667
	NL09	0.3	1	1	74.1667	13.35
	NL09	0.3	2	1	43.8333	4.15	2.25
	NL09	0.3	3	1	56.1667	8.18333	1.28
	NL09	1	1	1	28.4583	1.22	1.05
	NL09	1	2	1	206.208	20.3333	5.14
	NL09	1	3	1	14.125	0.976667	49.77
	NL09	3	1	1	268.333	15.6583	28.5
	NL09	3	2	1	147.667	6.35	11.73
	NL09	3	3	1	273.333	13.5833	14.86
	NL09	10	1	1	428.75	6.6	94.45
	NL09	10	2	1	677.5	17.5417	21.85
	NL09	10	3	1	328.333	4.51667	28.27
	NL09	30	1	1	1072.08	4.75	80.23
	NL09	30	2	1	925.833	4.1	66.13
	NL09	30	3	1	132.5	0.56	63.18
	GFHK99var	0	4	1	0.00541667	1.34167
	GFHK99var	0	5	1	0.00183333	1.46667
	GFHK99var	0	6	1	0.00175	1.335
	GFHK99var	0.3	1	1	4.1	1.29	1.24
	GFHK99var	0.3	2	1	5.15833	2.46667	0.22
	GFHK99var	0.3	3	1	3.9	1.59667	0.27
	GFHK99var	1	1	1	18.7417	2.35833	0.14
	GFHK99var	1	2	1	35.95	4.41667	0.61
	GFHK99var	1	3	1	12.625	1.82583	0.28
	GFHK99var	3	1	1	4.13333	0.149167	0.97
	GFHK99var	3	2	1	56.8333	2.26667	0.03
	GFHK99var	3	3	1	11.5083	0.58	0.65
	GFHK99var	10	1	1	75.75	1.44667	1.17
	GFHK99var	10	2	1	67.3333	0.806667	0.03
	GFHK99var	10	3	1	74.1667	1.12583	0.89
	GFHK99var	30	1	1	90.2917	0.274167	3.07
	GFHK99var	30	2	1	194.333	0.651667	0.77
	GFHK99var	30	3	1	330.417	0.913333	0.24
	NL09	0	1	2	0.00516667	0.00458333
	NL09	0	2	2	0.00533333	0.013
	NL09	0	3	2	0.00508333	0.0123333
	NL09	0.3	1	2	0.0266667	0.00175	0.18
	NL09	0.3	2	2	2.36667	0.1575	15.79
	NL09	0.3	3	2	0.0366667	0.00383333	0.38
	NL09	1	1	2	4.15	0.114167	11.45
	NL09	1	2	2	3.325	0.0908333	9.11
	NL09	1	3	2	23.9417	0.695833	69.78
	NL09	3	1	2	1.15	0.0135833	1.36
	NL09	3	2	2	0.0891667	0.00208333	0.21
	NL09	3	3	2	59.5833	1.01083	101.36
	NL09	10	2	2	57.1667	0.17	17.05
	NL09	10	3	2	81.75	0.261667	26.24
	NL09	30	1	2	167.5	0.455	45.63
	NL09	30	3	2	110.5	0.1125	11.28
	GFHK99var	0	4	2	0.000666667	0.0169167
	GFHK99var	0	5	2	0.000666667	0.00525
	GFHK99var	0	6	2	0.00133333	0.0159167
	GFHK99var	0.3	1	2	0.00283333	0.00333333	0.26
	GFHK99var	0.3	2	2	0.00191667	0.00641667	0.51
	GFHK99var	0.3	3	2	0.00508333	0.00766667	0.6
	GFHK99var	1	1	2	0.0241667	0.02	1.58
	GFHK99var	1	2	2	0.00466667	0.00508333	0.4
	GFHK99var	1	3	2	0.0206667	0.0275	2.17
	GFHK99var	3	1	2	0.0170833	0.00783333	0.62
	GFHK99var	3	2	2	0.0136667	0.000666667	0.05
	GFHK99var	3	3	2	0.161667	0.045	3.54
	GFHK99var	10	1	2	0.0366667	0.00308333	0.24
	GFHK99var	10	2	2	0.194167	0.018	1.42
	GFHK99var	10	3	2	0.168333	0.0204167	1.61
	GFHK99var	30	1	2	3.6	0.0608333	4.79
	GFHK99var	30	2	2	0.935	0.0208333	1.64
	GFHK99var	30	3	2	1.05167	0.0240833	1.9

## Sheet: S4 Fig
	Virus Stock	Gene Segment	Terminal copy no.	Internal Copy no.	Terminal: Internal Ratio
	GFHK99wt	PB2	1.11333e+09	1.11917e+09	0.99
	GFHK99wt	PB1	702500000	1.06333e+09	0.66
	GFHK99wt	PA	1225000000	1.47917e+09	0.83
	GFHK99wt	M	2.68833e+09	2537500000	1.06
	GFHK99var	PB2	1.51667e+09	345833	0.97
	GFHK99var	PB1	1500000000	1.35667e+09	1.11
	GFHK99var	PA	1.58333e+09	1450000000	1.09
	GFHK99var	M	1.94167e+09	1.88333e+09	1.03
	GFHK99wt PA K26E	PB2	2299000000	1900000000	1.21
	GFHK99wt PA K26E	PB1	2.01717e+09	2.05833e+09	0.98
	GFHK99wt PA K26E	PA	1.819e+09	1.78333e+09	1.02
	GFHK99wt PA K26E	M	2035000000	1.83333e+09	1.11
	GFHK99var PA K26E	PB2	6.36667e+08	567500000	1.12
	GFHK99var PA K26E	PB1	4.90833e+08	552500000	0.89
	GFHK99var PA K26E	PA	8.51667e+08	8.48333e+08	1
	GFHK99var PA K26E	M	1625000000	1.32583e+09	1.23
	NL09var	PB2	7.86667e+08	697500000	1.13
	NL09var	PB1	7.84167e+08	6.01667e+08	1.3
	NL09var	PA	5.64167e+08	547500000	1.03
	NL09var	M	6.08333e+08	540000000	1.13
	MaMN99wt	PB2	1625000000	1.40583e+09	1.16
	MaMN99wt	PB1	1300000	20000	1.06
	MaMN99wt	PA	1137500000	1.11833e+09	1.02
	MaMN99wt	M	1525000000	1.10917e+09	1.37
	Pan99wt	PB2	3.80167e+08	3.04833e+08	1.25
	Pan99wt	PB1	5.51667e+08	379000000	1.46
	Pan99wt	PA	6.49167e+08	3.56583e+08	1.82
	Pan99wt	M	5.63333e+08	4.92667e+08	1.14
	Pan99var	PB2	2.46667e+08	2.43333e+08	1.01
	Pan99var	PB1	522500000	3.73333e+08	1.4
	Pan99var	PA	6.88333e+08	5.03333e+08	1.37
	Pan99var	M	5.65833e+08	390000000	1.45
